# Supplementary material
Source: Research Square preprint supplement (doi:10.21203/rs.3.rs-10185169/v1)
Supplement: Supplementary file 1 [file 44f93c40d84ac6575fbbf75c.docx]

**Additional file 1. Detailed sample results after the introduction of a potentially Mycoplasma bovis infected bull/s.**

| Herd Size | Farm ID | Number of purch. bulls | Infected/ not infected | Summer 2023 | | | Autumn 2023 | | | Spring 2024 –  Summer 2024 | | | Autumn 2024 –  Winter 2025 | | |  | | |
| --- | --- | --- | --- | --- | --- | --- | --- | --- | --- | --- | --- | --- | --- | --- | --- | --- | --- | --- |
|  |  |  |  | NS NP | Milk | Serum | NS NP | Milk | Serum | NS NP | Milk | Serum | NS NP | Milk | Serum | Tonsils | | Testicles |
| n= | 27 |  |  |  |  |  |  |  |  |  |  |  |  |  |  |  | |  |
| 1–80 | 1 | 1 | 0 |  |  |  |  |  |  |  |  |  |  |  | 0/10 |  | |  |
|  | 2 | 1 | 0 |  |  |  |  |  |  |  |  |  |  |  | 0/9 |  | |  |
|  | 3 | 1 | 0 |  |  |  | 0/5 |  | 0/10 |  | 0/10 |  |  |  |  |  | |  |
|  | 4 | 1 | 0 |  |  |  | 0/13 |  | 0/10 |  |  |  |  |  |  |  | |  |
|  | 5 | 1 | 0 |  |  |  |  |  |  |  |  | 0/3 |  |  |  | 0 |  | 0 |
|  | 6 | 1 | 0 |  |  |  |  |  | 0/9 |  |  | 0/10 |  |  |  |  | |  |
|  | 7 | 1 | 0 |  |  |  | 0/18 |  | 0/10 |  |  |  |  |  |  |  | |  |
|  | 8 | 2 | 0 |  |  |  |  |  |  |  |  |  |  | 0/10 |  |  | |  |
|  |  |  |  |  |  |  |  |  |  |  |  |  |  |  |  |  | |  |
| 81–200 | 9 | 1 | 0 |  |  |  |  |  |  |  |  | 0/11 |  |  |  |  | |  |
|  | 10 | 1 | 0 |  |  | 0/11 | 0/20 |  |  | 0/20 |  | 0/10 |  |  |  |  | |  |
|  | 11 | 1 | 0 |  |  | 0/9 | 0/20 |  | 0/11 | 0/20 |  | 0/12 |  |  | 0/10 |  | |  |
|  | 12 | 1 | 1 |  |  |  |  |  |  |  |  |  |  |  | 1/10 |  | |  |
|  | 13 | 1 | 0 |  |  |  |  |  |  |  |  |  |  |  | 0/10 |  | |  |
|  | 14 | 1 | 0 |  |  |  |  |  |  |  |  |  |  |  | 0/10 |  | |  |
|  | 15 | 2 | 1 |  |  |  | 0/13 |  | 1/20 |  |  | 0/11 |  |  |  |  | |  |
|  | 16 | 2 | 1 |  |  |  |  |  |  |  |  |  |  |  | 1/10 |  | |  |
|  | 17 | 2 | 0 |  |  |  |  |  |  |  | 0/10 |  |  |  |  |  | |  |
|  | 18 | 3 | 0 |  |  | 0/12 |  |  | 0/24 |  |  |  |  |  |  |  | |  |
|  | 19 | 3 | 1 |  |  |  | **5/5** |  |  |  |  | 6/10 |  |  |  |  | |  |
|  |  |  |  |  |  |  |  |  |  |  |  |  |  |  |  |  | |  |
| > 200 | 20 | 1 | 1 |  |  |  |  |  | 11/12 |  |  |  |  | 7/10 |  |  | |  |
|  | 21 | 1 | 0 |  |  |  |  |  |  | 0/20 | 0/9 |  |  |  |  |  | |  |
|  | 22 | 1 | 1 |  | 0/12 |  | 0/18 | 0/10 |  | 0/20 | 1/20 | 1/25 |  |  |  | 1 | 0 | 0 |
|  | 23 | 1 | 0 | 0/8 |  | 0/10 |  |  |  | 0/20 |  |  |  |  |  |  | |  |
|  | 24 | 1 | 0 |  |  |  |  |  |  |  |  |  |  |  | 0/10 |  | |  |
|  | 25 | 2 | 0 | 0/20 |  | 0/25 |  |  |  |  | 0/10 |  |  |  | 0/10 |  | |  |
|  | 26 | 2 | 1 |  |  | 0/10 | **0/2** |  | 11/51 | 0/40 |  | 1/98 | 0/20 |  | 0/12 | 0 | | 0 |
|  | 27 | 2 | 1 |  |  |  |  |  |  |  |  |  |  |  | 5/10 |  |  |  |

**Additional file 1 (continued)**

Number of samples is presented as number of positive samples / numbers of all samples. NS stands for nasal swab sample and NP for deep nasopharyngeal swab sample.

NS neg./pos. (n= 0/295)

NP neg./pos. (n=5/7)

Milk neg./pos. (n = 8/101)

Serum neg./pos. (n = 38/535)

Total (n = 938)

0 not infected

1 infected

0 Tonsilla negative (Culturing)

1 Tonsilla positive (Culturing)

0 Testicles negative (Culturing)
